# Supplementary material for: One-pot ethanol production under optimized pretreatment conditions using agave bagasse at high solids loading with low-cost biocompatible protic ionic liquid
Source: Royal Society of Chemistry journal article supplement (doi:10.1039/d1gc03774a), 2021-11-30

**ONE-POT ETHANOL PRODUCTION UNDER OPTIMIZED PRETREATMENT  
CONDITIONS USING AGAVE BAGASSE AT HIGH SOLIDS LOADING WITH  
LOW-COST BIOCOMPATIBLE PROTIC IONIC LIQUID**

José A. Pérez-Pimienta<sup>a,b</sup>, Gabriella Papa<sup>c</sup>, Jian Sun<sup>c,d</sup>, Vitalie Stavila<sup>e</sup>, Arturo Sanchez<sup>a</sup>, John M. Gladden<sup>c,d</sup>, Blake A. Simmons<sup>c,\*</sup>

<sup>a</sup> Laboratorio de Futuros en Bioenergía, Unidad Guadalajara de Ingeniería Avanzada, Centro de Investigación y Estudios Avanzados (CINVESTAV), Zapopan, Mexico

<sup>b</sup> Department of Chemical Engineering, Universidad Autónoma de Nayarit, Tepic, Mexico

<sup>c</sup> Joint BioEnergy Institute, Biological Systems and Engineering Division, Lawrence Berkeley National Laboratory, Emeryville, CA, United States

<sup>d</sup> Department of Biomass Science and Conversion Technology, Sandia National Laboratories, Livermore, CA, United States

<sup>e</sup> Energy Nanomaterials Department, Sandia National Laboratories, Livermore, CA, United States

\*Corresponding author

E-mail address: japerez@uan.edu.mx

Telephone: +52-3112118821

**Table S1.** ANOVA results from the response surface quadratic model for the glucan and xylan conversion for optimization of ionic liquid pretreatment using Agave bagasse.

| Response      | Source      | df <sup>a</sup> | SS <sup>b</sup> | MS <sup>c</sup> | F-ratio | Sig.    | R <sup>2</sup> /adjusted R <sup>2</sup> | CV(%) <sup>d</sup> /adequate precision |
|---------------|-------------|-----------------|-----------------|-----------------|---------|---------|-----------------------------------------|----------------------------------------|
| <b>Glucan</b> | Model       | 9               | 5374.03         | 597.11          | 23.74   | <0.0001 | 0.9553/0.9150                           | 9.13/17.37                             |
|               | Lack of fit | 5               | 235.8           | 47.16           | 14.98   | 0.005   |                                         |                                        |
|               | Pure error  | 5               | 15.74           | 3.15            |         |         |                                         |                                        |
|               | Residual    | 10              | 251.55          | 25.15           |         |         |                                         |                                        |
|               | Total       | 19              | 5625.57         | 19              |         |         |                                         |                                        |
| <b>Xylan</b>  | Model       | 9               | 1743.14         | 193.68          | 25.29   | <0.0001 | 0.9579/0.9200                           | 14.29/17.72                            |
|               | Lack of fit | 5               | 69.22           | 13.84           | 9.41    | 0.014   |                                         |                                        |
|               | Pure error  | 5               | 7.36            | 1.47            |         |         |                                         |                                        |
|               | Residual    | 10              | 76.57           | 7.66            |         |         |                                         |                                        |
|               | Total       | 19              | 1819.71         |                 |         |         |                                         |                                        |

Calculated by using the multiple regression model:

❖ Glucan conversion (%) = 365.91173 - 5.04206\*Temperature - 1.82364\*IL concentration + 0.658486\*Time + 0.002135\*Temperature\*IL concentration + 0.054046\* Temperature\* Time - 0.009197\*IL concentration\*Time + 0.021504\*Temp<sup>2</sup> + 0.012018\*ILconcentration<sup>2</sup> - 0.26773\*Time<sup>2</sup>

❖ Xylan conversion (%) = 129.03587 - 2.24613\*Temperature - 0.139742\*IL concentration - 2.70466\*Time - 0.003018\*Temperature\*IL concentration + 0.057846\*Temperature\*Time - 0.013698\*IL concentration\*Time + 0.010842\*Temperature<sup>2</sup> + 0.004111\*ILconcentration<sup>2</sup> - 0.131845\*Time<sup>2</sup>

<sup>a</sup>Degrees of freedom in the source

<sup>b</sup>Sum of squares due to the source

<sup>c</sup>Mean sum of squares due to the source

<sup>d</sup>Coefficient of variation

**Table S2:** Aromatic compounds detected in the untreated agave bagasse, EMAL and OP samples using Py-GC/MS.

| Num | Compounds                                                              | Elution Time        | Mass Fragment            | Formula                                        | Origin |
|-----|------------------------------------------------------------------------|---------------------|--------------------------|------------------------------------------------|--------|
| 1   | guaiacol/mequinol/2-methoxyphenol                                      | 4.05                | 81/109/124               | C <sub>7</sub> H <sub>8</sub> O <sub>2</sub>   | G      |
| 2   | 4-methylphenol, p-cresol                                               |                     | 77,79,107,108            | C <sub>7</sub> H <sub>8</sub> O                | H      |
| 3   | Pyrocatechol                                                           | 4.3                 | 97,140                   | C <sub>7</sub> H <sub>8</sub> O <sub>3</sub>   | G      |
| 4   | 2-methoxy-4-methyl phenol (creosol)                                    | 6.27                | 67,95,123,138            | C <sub>8</sub> H <sub>10</sub> O <sub>2</sub>  |        |
| 5   | 4-vinyl phenol (shows 2,3-dihydro benzofuran)-coumaran                 | 7.65                | 91/120                   | C <sub>8</sub> H <sub>8</sub> O                | H      |
| 6   | 4-ethylguaiacol (4-ethyl-2methoxy phenol)                              | 9.4                 | 137/152                  | C <sub>9</sub> H <sub>12</sub> O <sub>2</sub>  | G      |
| 7   | 4-vinylguaiacol (2-methoxy-4 vinyl phenol)                             | 11.08               | 77/107/135/150           | C <sub>9</sub> H <sub>10</sub> O <sub>2</sub>  | G      |
| 9   | 2,6-dimethoxy phenol/syringol                                          | 12.82               | 65/93/ 139/154           | C <sub>8</sub> H <sub>10</sub> O <sub>3</sub>  | S      |
| 10  | phenol, 2 methoxy-5-(2propenyl) 3-allyl-6-methoxyphenol                | 1.95                | 65/77/91/103/131/154/164 | C <sub>10</sub> H <sub>12</sub> O <sub>2</sub> | G      |
| 11  | isovanillin/p-arisaldehyde                                             | 13.7 14.15          | 151/152                  | C <sub>8</sub> H <sub>8</sub> O <sub>3</sub>   | G      |
| 12  | Phenol 2, methoxy-5 (1 propenyl)                                       | 14.23               | 77/91/ 103/ 164          | C <sub>10</sub> H <sub>12</sub> O <sub>2</sub> | G      |
| 13  | 4-methoxy-3-methoxymethyl phenol                                       | 15.04               | 168                      | C <sub>9</sub> H <sub>12</sub> O <sub>3</sub>  | G      |
| 14  | 4-propenyl guaiacol (2-methoxy-4-propenyl phenol)<br>isoeugenol        | 15.19               | 77/ 91/103/164           | C <sub>10</sub> H <sub>12</sub> O <sub>2</sub> | G      |
| 15  | vanillic acid                                                          | 15-06               | 77/79/107/125/ 153/168   | C <sub>8</sub> H <sub>8</sub> O <sub>4</sub>   | G      |
| 16  | 4 hydroxy-3-methoxyphenylpropane Phenol 2, methoxy-4<br>propyl         | 15.3                | 137                      | C <sub>10</sub> H <sub>14</sub> O <sub>2</sub> | G      |
| 17  | p-Ethylguaiacol                                                        | 16.2                | 137                      | C <sub>9</sub> H <sub>12</sub> O <sub>2</sub>  | G      |
| 18  | phenol, 4-(3-hydroxy-1propenyl-2methoxy                                | 16.5                | 77/91/137/180            | C <sub>10</sub> H <sub>12</sub> O <sub>3</sub> | G      |
| 19  | 3-tert-butyl-4-hydroxyarisole                                          | 17.1                | 91/137/165/180           | C <sub>11</sub> H <sub>16</sub> O <sub>2</sub> | G      |
| 20  | phenol, 2,6 dimethoxy-4-(2-propenyl)<br>(4-allyl-2,6-dimethoxy phenol) | 17.64, 18.34, 19.03 | 91/194                   | C <sub>12</sub> H <sub>14</sub> O <sub>3</sub> | S      |
| 21  | Acetosyringone (4-hydroxy-3,5-dimethoxy acetophenone)                  | 19.43               | 153/181/196              | C <sub>10</sub> H <sub>12</sub> O <sub>4</sub> | S      |

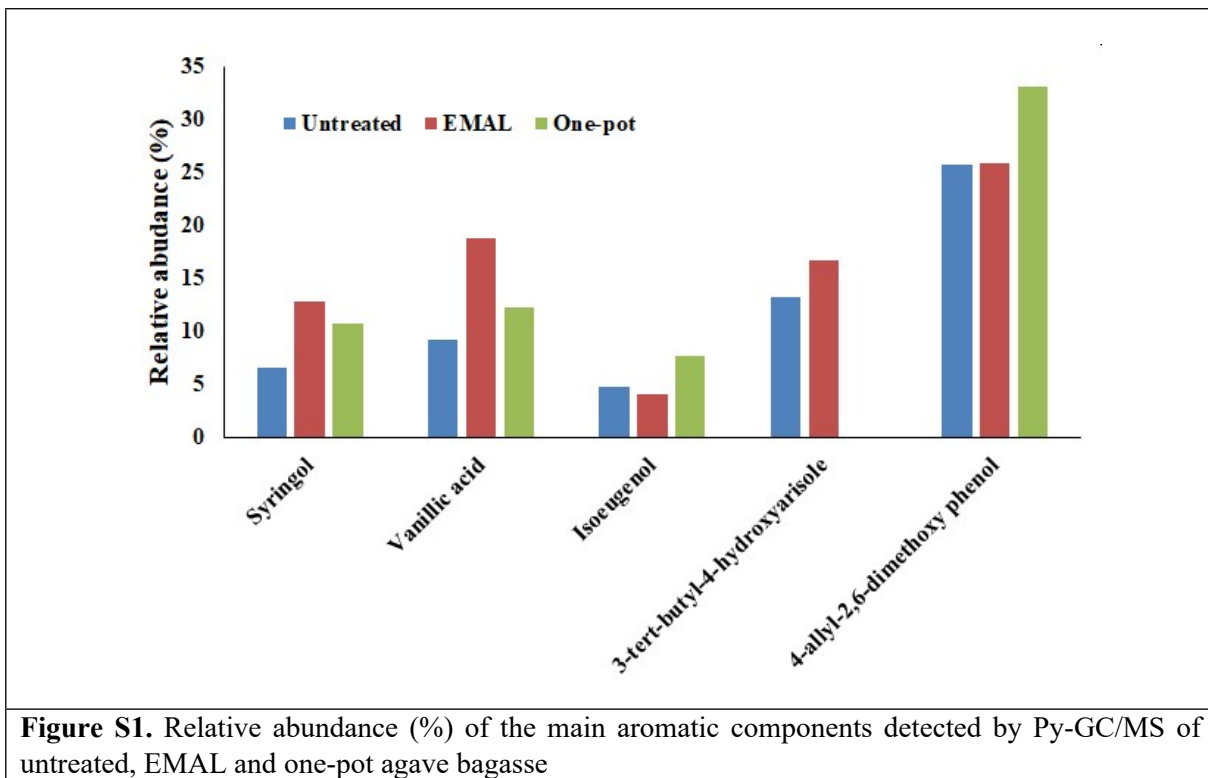

Supplement: d1gc03774a1.pdf [file d1gc03774a1.pdf]
